# Supplementary material
Source: publisher figshare collection journal article supplement (https://acs.figshare.com/ndownloader/files/5732838)

## **Supporting Information**

### **Dynamics of Electron Injection in DNA Hairpins**

Frederick D. Lewis\*, Xiaoyang Liu, Scott E. Miller, Ryan T. Hayes, and Michael R. Wasielewski\*

Department of Chemistry, Northwestern University, Evanston, IL 60208-3113

\* Address correspondence to [lewis@chem.northwestern.edu](mailto:lewis@chem.northwestern.edu) or [wasielew@chem.northwestern.edu](mailto:wasielew@chem.northwestern.edu).

**Figure S1.** Normalized transient absorption spectra for the hairpin **1G:C** obtained at several delay times following excitation at 340 nm with a 130 fs laser pulse.

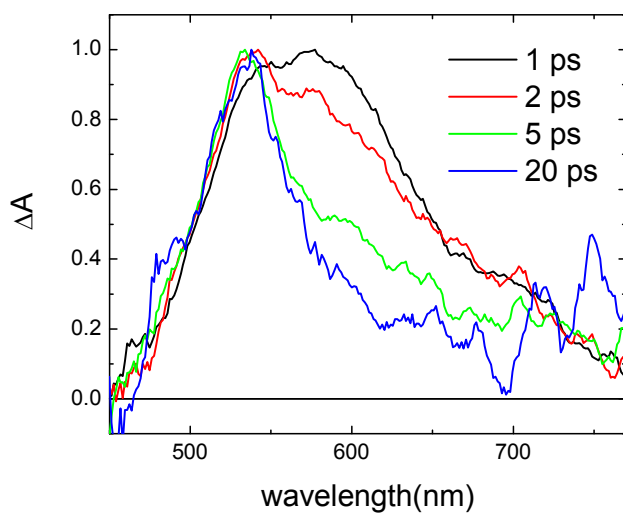

**Figure S2.** Transient decay for hairpin **1-G:C** following 340 nm excitation.

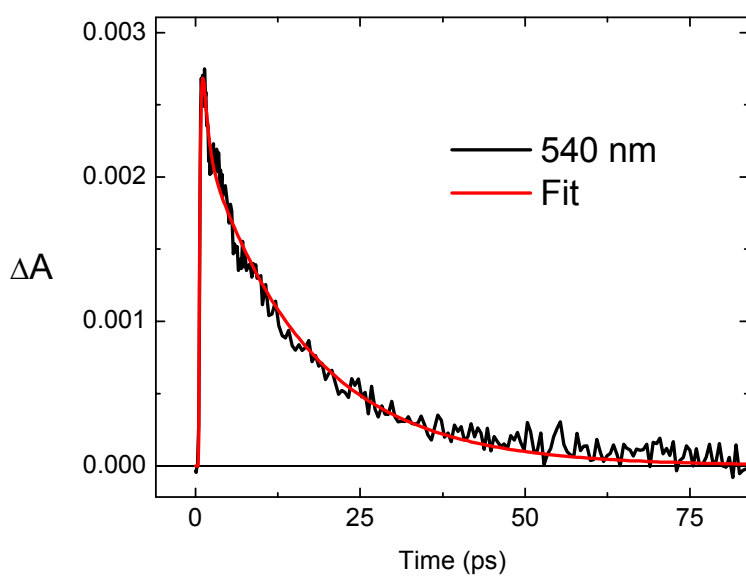

**Figure S3.** Normalized transient absorption spectra for the hairpin **1G:G** obtained at several delay times following 340 nm excitation.

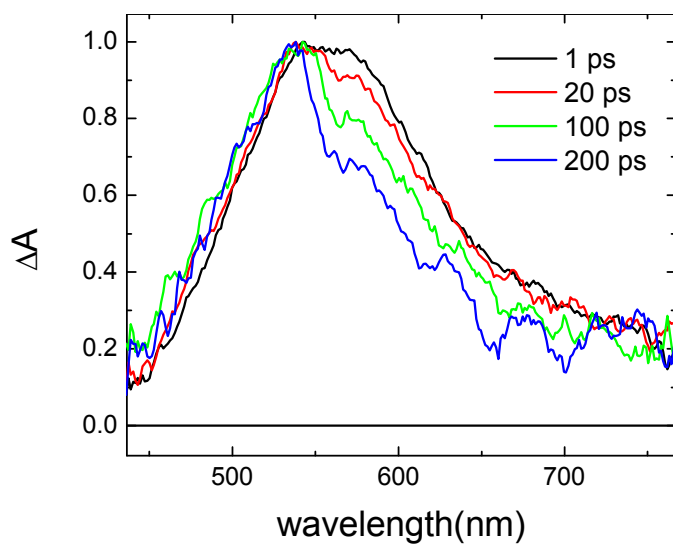

**Figure S4.** Transient decay for hairpin **1-G:G** following 340 nm excitation.

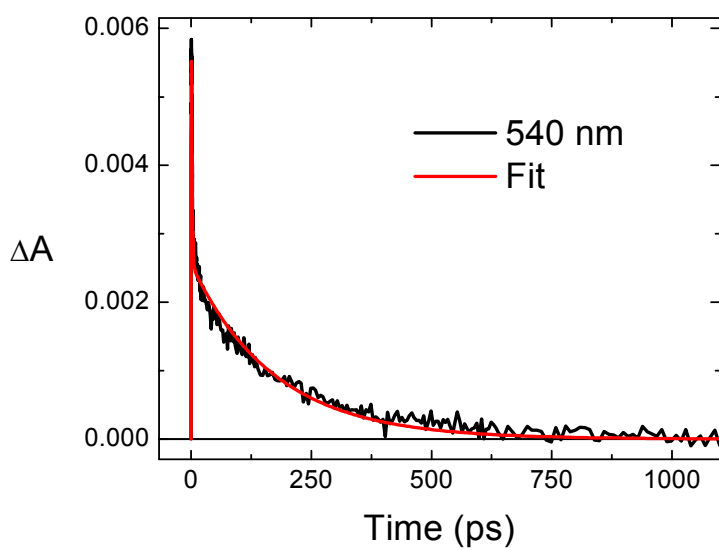

Supplement: Supplementary file 1 [file 5732838]
